# Supplementary material for: Zeolitic octahedral niobium oxide with microchannels of seven-membered rings for photocatalytic H2 evolution from saline water
Source: Royal Society of Chemistry journal article supplement (doi:10.1039/d1nr01138c), 2021-01-01
Supplement: d1nr01138c1.pdf [file d1nr01138c1.pdf]

## Supporting Information

### **Zeolitic Octahedral Niobium Oxide with Microchannels of Seven-Membered Rings for photocatalytic H<sub>2</sub> evolution from Saline Water**

*Chuntian Qiu,<sup>#†</sup> Qianqian Zhu,<sup>§†</sup> Yanling Yao,<sup>&</sup> Zhenxin Zhang<sup>§\*</sup>*

<sup>§</sup>Prof. Z. Zhang, Prof. Q. Zhu

School of materials science and chemical engineering, Ningbo University, Fenghua Road 818, Jiangbei, Ningbo, Zhejiang 315211, P. R.China

zhangzhenxin@nbu.edu.cn

<sup>#</sup>Dr. C. Qiu,

SZU-NUS Collaborative Innovation Center for Optoelectronic Science & Technology, International Collaborative Laboratory of 2D Materials for Optoelectronics Science and Technology of Ministry of Education, Institute of Microscale Optoelectronics, Shenzhen University, Shenzhen 518060, P. R. China

<sup>&</sup> Dr. Y. Yao

School of Chemistry and Chemical Engineering, Huizhou University, Huizhou 516007, P. R. China.

<sup>†</sup> Those authors contribute equally to this work.

## Computational Details

Density functional theory (DFT) calculations in this work were performed based on the Perdew-Burke-Ernzerhof (PBE) form of generalized gradient approximation functional (GGA) by employing the Vienna ab-initio simulation package (VASP).<sup>[1]</sup> To describe the interactions between valence electrons and ion cores, the Blöchl's all-electron-like projector augmented wave (PAW) method was employed.<sup>[2]</sup> A kinetic cutoff energy of 400 eV was applied for the plane wave basis set. Brillouin zone integration was approximated by a  $3 \times 3 \times 1$  k-points using the Monkhorst–Pack grid.<sup>[3]</sup> Geometries were optimized until the energy was converged to  $1.0 \times 10^{-6}$  eV/atom and the force was converged to 0.01 eV/Å. To avoid the periodic interactions for all the structures, a vacuum layer as large as 20 Å is used along the c direction normal to the surface.

The free energy ( $G$ ) of hydrogen evolution reaction (HER) on the catalysts surface was calculated using the equation:<sup>[4]</sup>

$$G = E + ZPE - TS$$

where  $E$ ,  $ZPE$  and  $TS$  are the total energy from DFT calculations, zero point energy and entropic contributions ( $T$  was set to be 300K), respectively.  $ZPE$  values are derived after the frequency calculation by:<sup>[5]</sup>

$$ZPE = \frac{1}{2} \sum h\nu_i$$

$TS$  values of adsorbed species are calculated using the vibrational frequencies:<sup>[6]</sup>

$$TS_v = k_B T \left[ \sum_K \ln \left( \frac{1}{1 - e^{-h\nu_K/k_B T}} \right) + \sum_K \frac{h\nu_K}{k_B T} \frac{1}{(e^{h\nu_K/k_B T} - 1)} \right]$$

where  $k_B$  is the Boltzmann constant,  $T$  is Temperature, which is set as 300 K,  $\nu$  is vibrational frequency for the intermediates and  $K$  is vibrational mode, which is obtained from DFT calculations using VASP. The Gibbs free energy of ( $H^+ + e^-$ ) is equivalent to the energy of  $1/2G_{H_2}$  in the study.

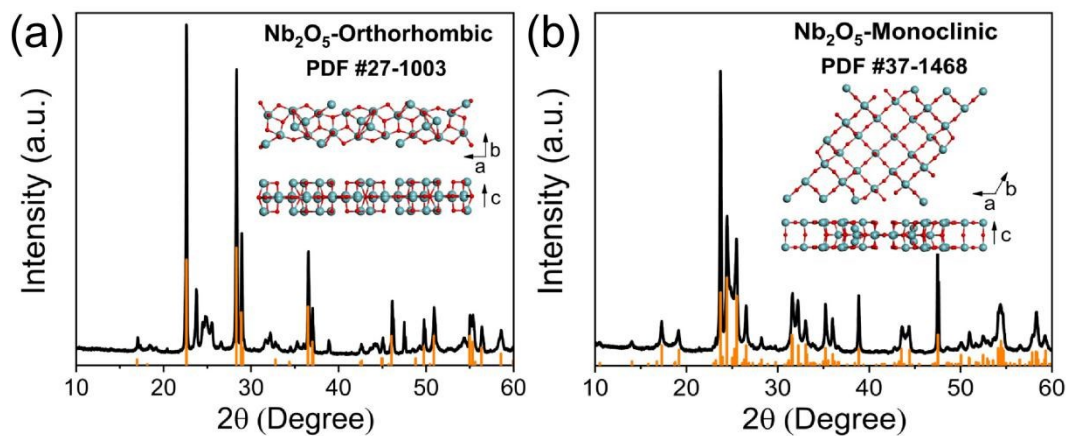

**Figure S1.** XRD patterns of pristine  $\text{Nb}_2\text{O}_5$  with various symmetric structures: orthorhombic (a), monoclinic (b).

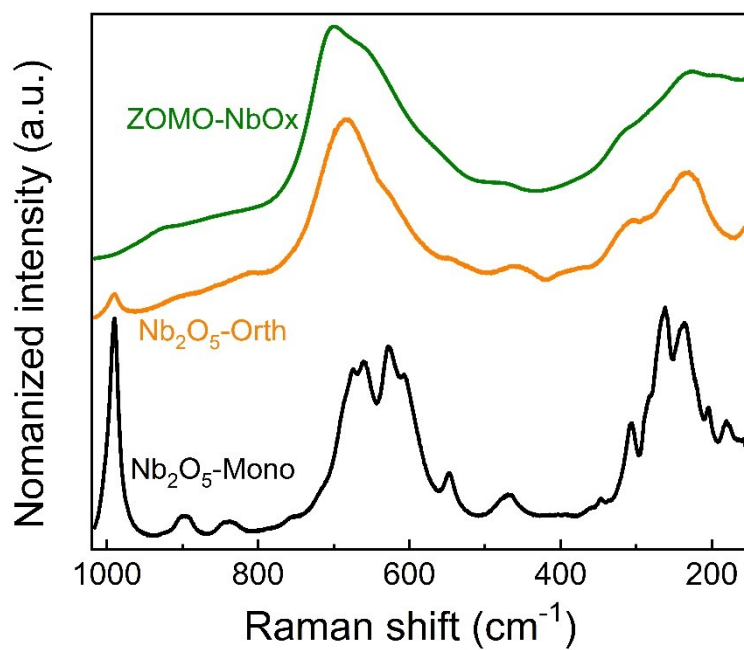

**Figure S2.** Raman spectra of as-synthesized ZOMO-NbOx, and pristine  $\text{Nb}_2\text{O}_5$  with orthorhombic, and monoclinic symmetric structure.

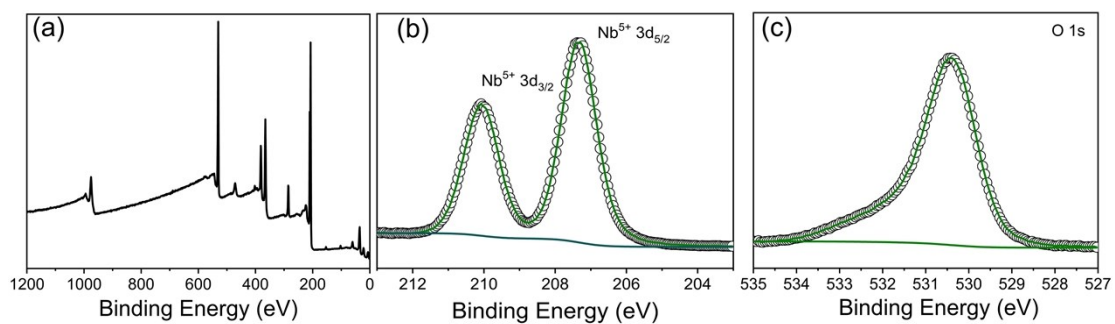

**Figure S3.** The XPS survey (a), Nb 3d (b), and O 1s spectra (c) of ZOMO-NbOx.

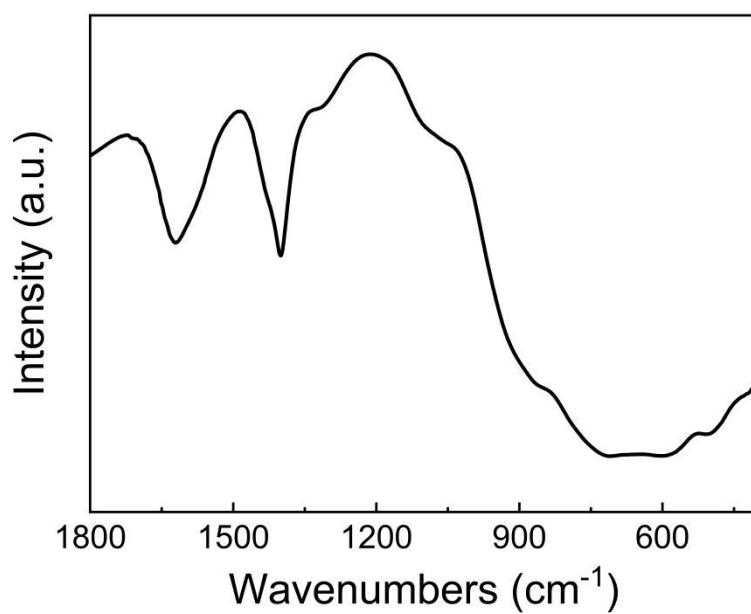

**Figure S4.** FTIR spectra of ZOMO-NbOx.

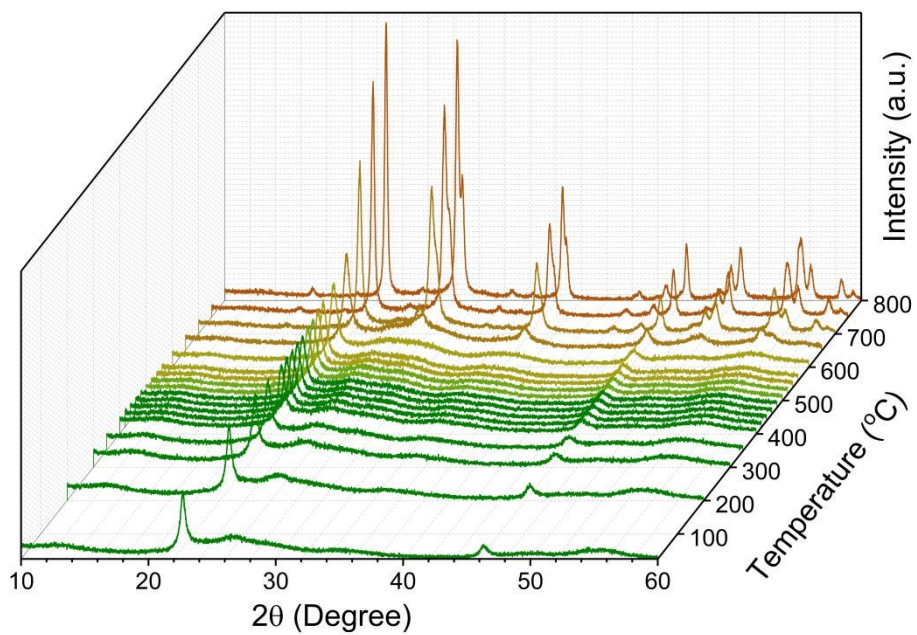

**Figure S5.** *In situ* temperature programming XRD patterns of ZOMO-NbOx under Ar atmosphere.

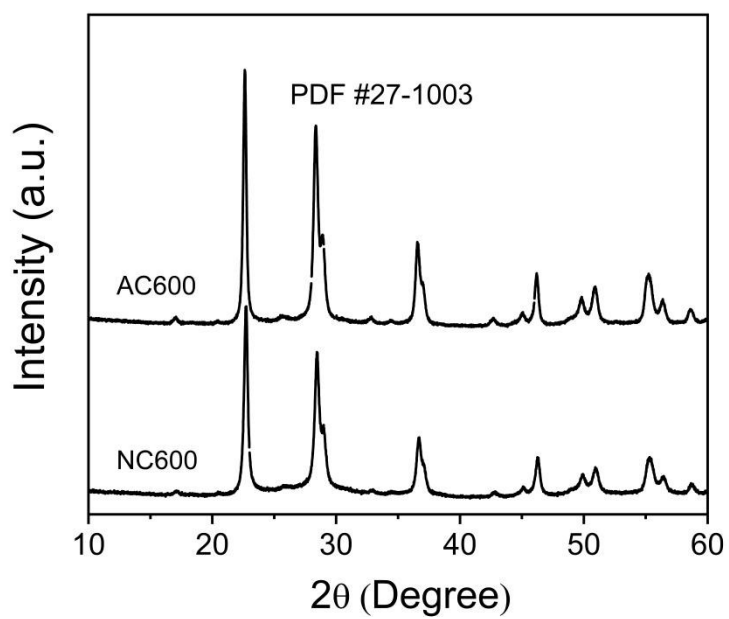

**Figure S6.** XRD patterns of ZOMO-NbOx calcined at 600°C in air (AC600) and  $N_2$  (NC600) for 2h.

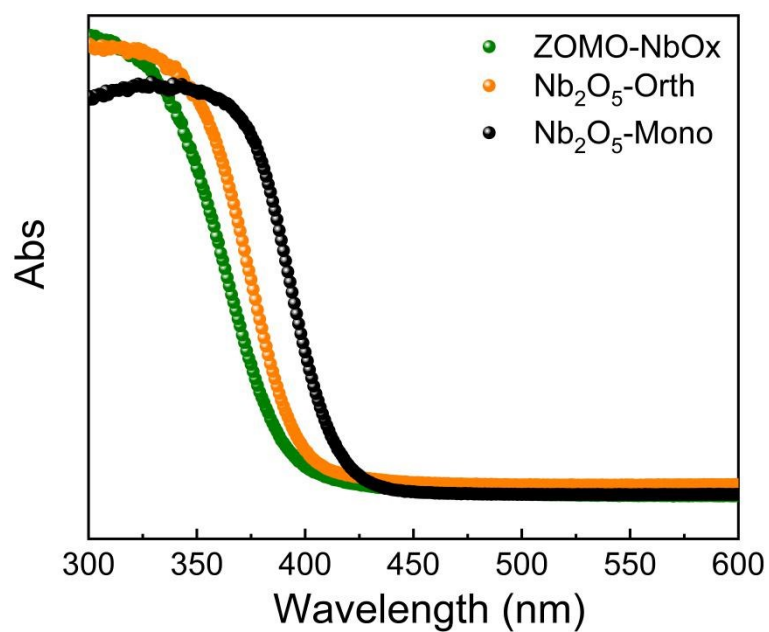

**Figure S7.** UV-vis DRS spectra comparison of as-synthesized ZOMO-NbO<sub>x</sub>, and pristine Nb<sub>2</sub>O<sub>5</sub> with orthorhombic, and monoclinic symmetric structure.

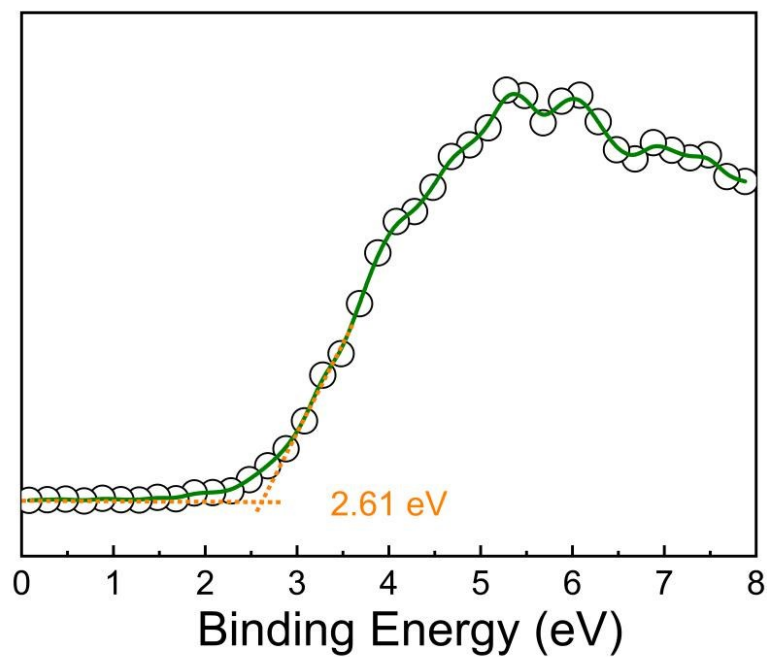

**Figure S8.** XPS valence band (VB) spectrum determined the band structure of as-synthesized ZOMO-NbO<sub>x</sub>.

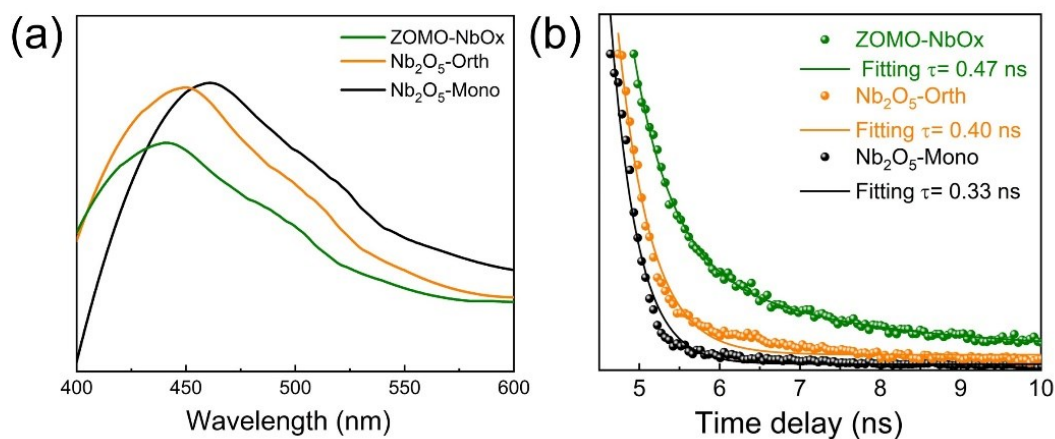

**Figure S9.** PL (a) and time-resolved fluorescence decay spectra (b) of as-synthesized ZOMO-NbO<sub>x</sub>, and pristine Nb<sub>2</sub>O<sub>5</sub> with orthorhombic, and monoclinic symmetric structure.

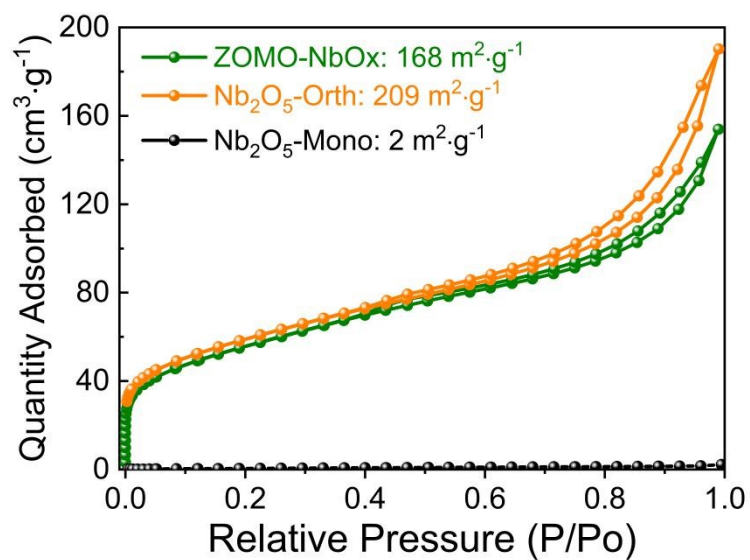

**Figure S10.** N<sub>2</sub> adsorption-desorption isotherm of as-synthesized ZOMO-NbO<sub>x</sub>, and pristine Nb<sub>2</sub>O<sub>5</sub> with orthorhombic, and monoclinic symmetric structure.

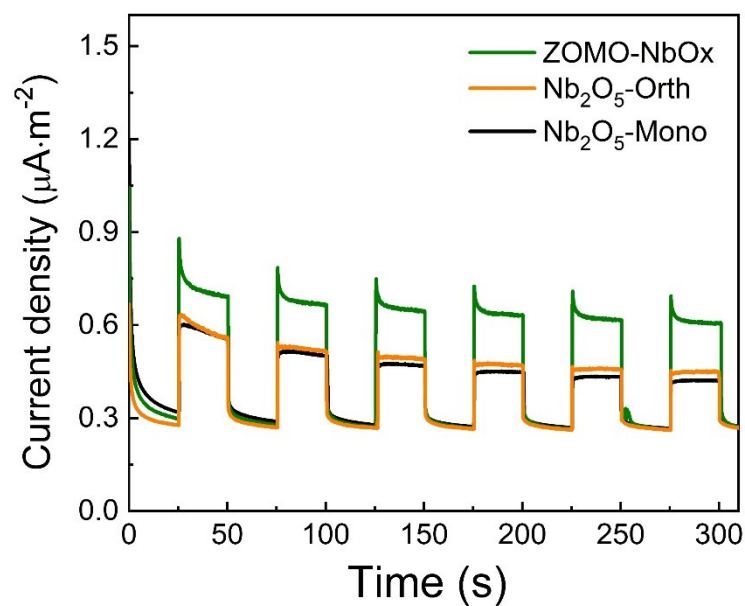

**Figure S11.** Photocurrent transient responses of as-synthesized ZOMO-NbO<sub>x</sub>, and pristine Nb<sub>2</sub>O<sub>5</sub> with orthorhombic, and monoclinic symmetric structure.

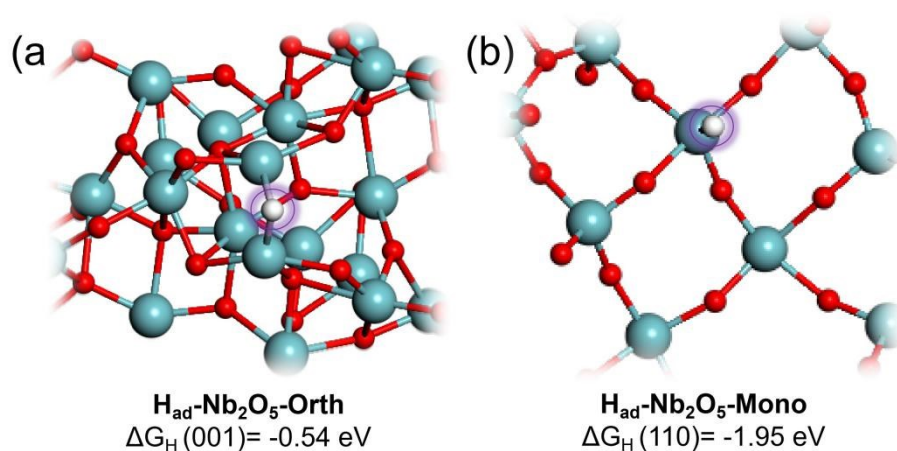

**Figure S12.** DFT calculations of hydrogen adsorption free energy on: (001) plane of pristine Nb<sub>2</sub>O<sub>5</sub> with orthorhombic symmetric structure (a); and on (110) plane of Nb<sub>2</sub>O<sub>5</sub> with monoclinic symmetric structure (b).



## References

- [1] a) Perdew, J. P.; Burke, K.; Ernzerhof M. Generalized Gradient Approximation Made Simple. *Phys. Rev. Lett.* **1996**, 77, 3865-3868; b) Kresse, G.; Furthmüller, J. Efficiency of Ab-initio Total Energy Calculations for Metals and Semiconductors Using a Plane-Wave Basis Set. *Comp. Mater. Sci.* **1996**, 6, 15-50; c) Kresse, G.; Hafner, J. Ab initio Molecular Dynamics for Liquid Metals. *Phys. Rev. B* **1993**, 47, 558-561; d) Kresse, G.; Hafner, J. Ab initio Molecular-Dynamics Simulation of the Liquid-Metal–Amorphous-Semiconductor Transition in Germanium. *Phys. Rev. B* 1994, 49, 14251-14269.
- [2] a) Blöchl, P. E. Projector Augmented-Wave Method. *Phys. Rev. B* **1994**, 50, 17953-17979; b) Kresse, G.; Joubert, D. From Ultrasoft Pseudopotentials to the Projector Augmented-Wave Method. *Phys. Rev. B* **1999**, 59, 1758-1775.
- [3] Monkhorst, H. J.; Pack, J. D. Special Points for Brillouin-Zone Integrations. *Phys. Rev. B* **1976**, 13, 5188-5192.
- [4] J. K. Nørskov, T. Bligaard, A. Logadottir, J. R. Kitchin, J. G. Chen, S. Pandalov and U. Stimming, PLoS One 5 (2005) e12154-e12154.
- [5] J. K. Nørskov, J. Rossmeisl, A. Logadottir, L. Lindqvist, J. R. Kitchin, T. Bligaard and H. Jónsson, J. Chem. Phys. B 108 (2004) 17886-17892.
- [6] L. I. Bendavid and E. A. Carter, The Journal of Physical Chemistry C 117 (2013) 26048-26059.
